# Supplementary material for: Towards highly active heterogeneous catalysts via a sequential noncovalent bonding strategy
Source: Royal Society of Chemistry journal article supplement (doi:10.1039/d1nj04303j), 2021-12-02
Supplement: d1nj04303j1.pdf [file d1nj04303j1.pdf]

## Supporting Information

### **Towards highly active heterogeneous catalysts via a sequential noncovalent bonding strategy**

*Ruixue Wang<sup>1</sup>, Ying Yue<sup>1</sup>, Huiying Wei \*, Jinxin Guo \* and Yanzhao Yang*

<sup>1</sup> School of Chemistry and Chemical Engineering, Shandong University, Jinan City, Shandong 250100, P.R. China

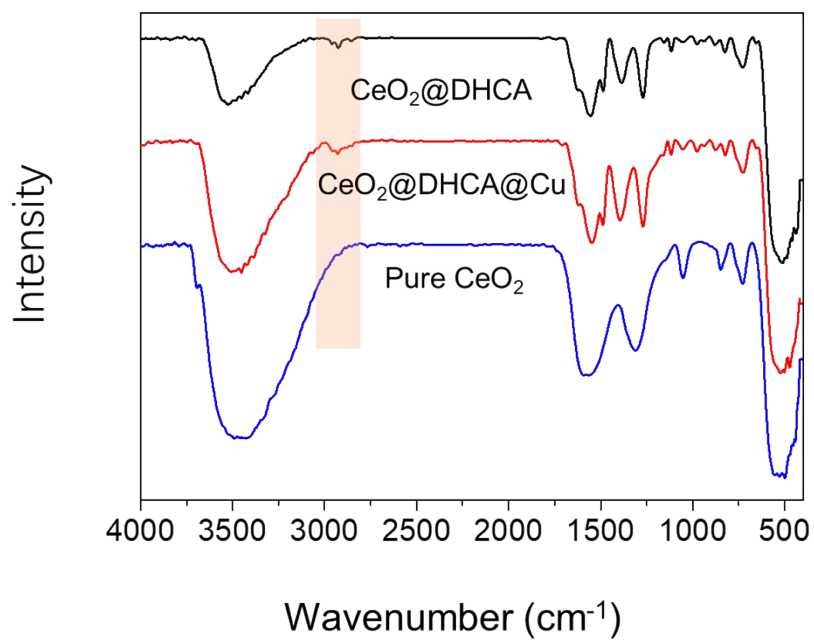

**Figure S1.** IR spectra of CeO<sub>2</sub>@DHCA, CeO<sub>2</sub>@DHCA@Cu and Pure CeO<sub>2</sub>.

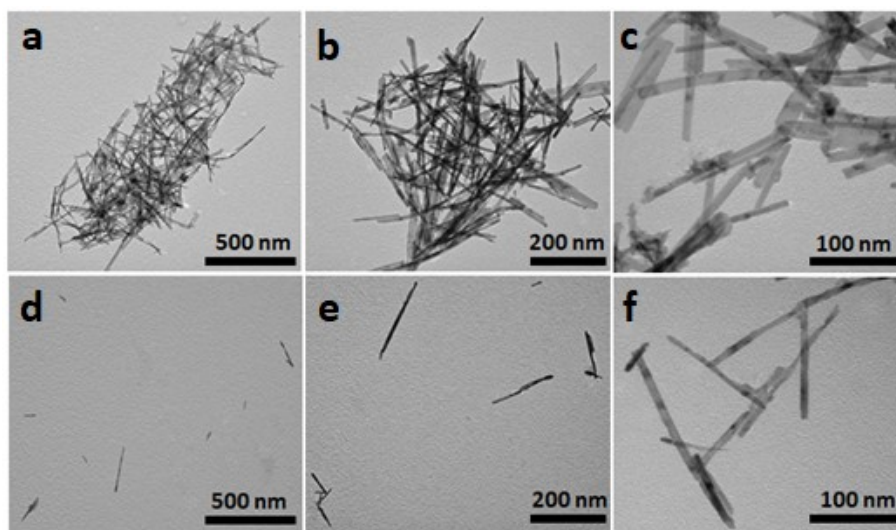

**Fig. S2** (a-c) TEM image of the CeO<sub>2</sub> NRs with 3, 4-DHCA; (d-f) TEM image of CeO<sub>2</sub> INRs without 3, 4-DHCA.

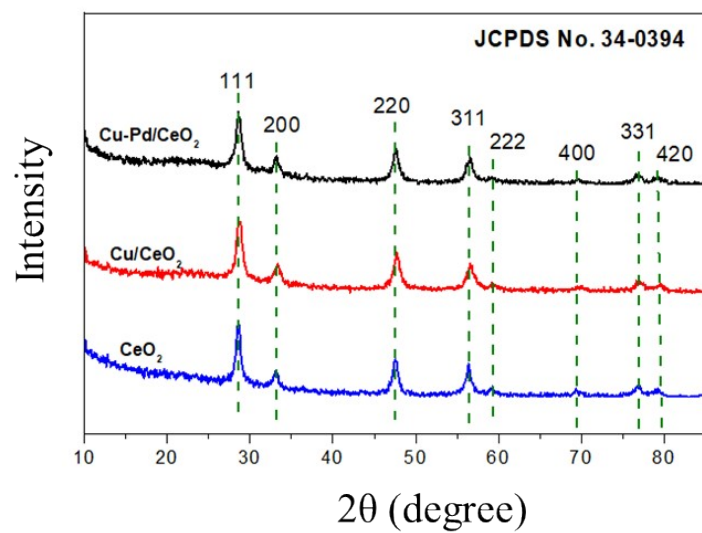

**Fig. S3** XRD patterns of CeO<sub>2</sub>, Cu/CeO<sub>2</sub> and Pd-Cu/CeO<sub>2</sub> nanorods

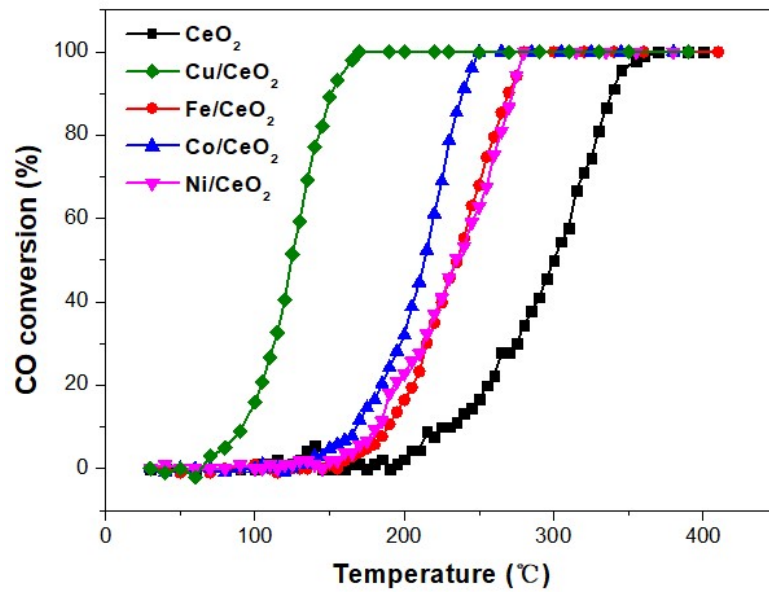

**Fig. S4** Conversion of CO over CeO<sub>2</sub>, Cu/CeO<sub>2</sub>, Fe/CeO<sub>2</sub>, Co/CeO<sub>2</sub>, Ni/CeO<sub>2</sub> nanorods
